# Supplementary material for: HBV and HCV Co-Infection in Chinese Newly Diagnosed HIV+ Subjects in 2015 and 2023: A Cross-Sectional Study
Source: MDPI journal article supplement (doi:10.3390/pathogens13050367), 2024-04-29
Supplement: s1 [file s1]

SUPPLEMENTARY TABLE S1. Changes in the prevalence of HBV and HCV between missing and non-missing values in 2015 and 2023.

| Characteristic         |                | 2015, n (%)  | 2023, n (%)  | P      | Total, n (%)  |
|------------------------|----------------|--------------|--------------|--------|---------------|
| Total                  | Missing or not | 4501 (100.0) | 6523 (100.0) | <0.001 | 11024 (100.0) |
|                        | No             | 4435 (98.5)  | 6351 (97.4)  | <0.001 | 10786 (97.8)  |
| Sex                    | Yes            | 66 (1.5)     | 172 (2.6)    | <0.001 | 238 (2.2)     |
|                        | No             | 4343 (96.5)  | 6450 (98.9)  | <0.001 | 10793 (97.9)  |
| Route of HIV infection | Yes            | 158 (3.5)    | 73 (1.1)     | <0.001 | 231 (2.1)     |
|                        | No             | 4429 (98.4)  | 6505 (99.6)  | <0.001 | 10934 (99.2)  |
| Ethnicity              | Yes            | 72 (1.6)     | 18 (0.4)     | <0.001 | 90 (0.8)      |
|                        | No             | 4421 (98.2)  | 6417 (98.4)  | <0.001 | 10838 (98.3)  |
| Education              | Yes            | 80 (1.8)     | 106 (1.6)    | <0.001 | 186 (1.7)     |
|                        | No             | 4403 (97.8)  | 6414 (98.3)  | <0.001 | 10817 (98.1)  |
| Marital status         | Yes            | 98 (2.2)     | 109 (1.7)    | <0.001 | 207 (1.9)     |
|                        | No             | 4074 (90.5)  | 6334 (97.1)  | <0.001 | 10408 (94.4)  |
| CD4 (cells/ $\mu$ l)   | Yes            | 427 (9.5)    | 189 (2.9)    | <0.001 | 616 (5.6)     |

P values were calculated using Cochran-Armitage trend test. P values <0.05 is statistically significant.
